# Supplementary material for: Specific Detection of Yersinia pestis Based on Receptor Binding Proteins of Phages
Source: PubMed Central journal article supplement (PMC7460101; doi:10.3390/pathogens9080611), 2020-07-27
Supplement: pathogens-09-00611-s001.pdf [file pathogens-09-00611-s001.pdf]

# Supplementary material for: **Specific detection of *Yersinia pestis* based on receptor binding proteins of phages**

Friederike Born ‡, Peter Braun ‡, Holger C. Scholz , and Gregor Grass \*

Bundeswehr Institute of Microbiology (IMB), Dept. of Bacteriology and Toxinology, 80937 Munich, Germany; friederikeleonieborn @bundeswehr.org (F.B.); peter3braun@bundeswehr.org (P.B.); holger1scholz@bundeswehr.org (H.C.S.)

\* Correspondence: gregorgrass@bundeswehr.org; Tel.: +49-99-2692-3981

‡ Both authors contributed equally to this work.

**Supplementary Table S1: Strains, phages and plasmids used in this work.**

| Strain/phage/plasmid                        | Characteristics                                                                                                                                          | Reference                                                        |
|---------------------------------------------|----------------------------------------------------------------------------------------------------------------------------------------------------------|------------------------------------------------------------------|
| <i>E. coli</i> BL21 (DE3)                   | <i>F ompT hsdSB (r<sub>B</sub> m<sub>B</sub>) gal dcm</i> (DE3)                                                                                          | ThermoFisher Scientific, Darmstadt, Germany                      |
| <i>E. coli</i> ArcticExpress™ (DE3)         | <i>E. coli B F- ompT hsdS(r<sub>B</sub> m<sub>B</sub>) dcm<sup>+</sup> Tet<sup>r</sup> gal λ</i> (DE3) <i>endA Hte [cpn10cpn60 Gentr]</i>                | Agilent Technologies, Waldbronn, Germany                         |
| <i>E. coli</i> NEB Turbo                    | <i>F' proA<sup>+</sup>B<sup>+</sup> lacI<sup>q</sup> ΔlacZ M15/ fhuA2 Δ(lac-proAB) glnV gal R(zgb-210::Tn10)Tet<sup>S</sup> endA1 thi-1 Δ(hsdS-mcrB)</i> | New England Biolabs GmbH, Frankfurt am Main, Germany             |
| <i>Yersinia pestis</i> EV 76                | Attenuated deletion mutant ( <i>pgm/hms<sup>-</sup></i> ), vaccine strain                                                                                | [1]                                                              |
| <i>Yersinia pestis</i> Kuma                 | Bv. Antiqua                                                                                                                                              | [2]                                                              |
| <i>Yersinia pestis</i> M23                  | Bv. Orientalis                                                                                                                                           | [3]                                                              |
| <i>Yersinia pestis</i> TS                   | Bv. Orientalis                                                                                                                                           | [4]                                                              |
| <i>Yersinia pestis</i> G8786                | Bv. Pestoides, isolated from Georgia                                                                                                                     | [5]                                                              |
| <i>Yersinia pestis</i> Rodent 24            | Bv. Medievalis, isolated from rodent in Kurdistan                                                                                                        | [6]                                                              |
| <i>Yersinia pestis</i> NCTC 10029           | Bv. Antiqua, isolated from human, Nairobi, Kenya, 1958                                                                                                   | The National Collection of Type Cultures (NCTC) for bacteria, UK |
| <i>Yersinia pseudotuberculosis</i> (B-1706) | Isolated from beaver (Germany)                                                                                                                           | Strain collection of the Bundeswehr Institute of Microbiology    |
| <i>Yersinia pseudotuberculosis</i> (Y-714)  | O:1a                                                                                                                                                     | Strain collection of the Bundeswehr Institute of Microbiology    |
| <i>Yersinia pseudotuberculosis</i> (Y-715)  | O:1a                                                                                                                                                     | Strain collection of the Bundeswehr Institute of Microbiology    |

| Strain/phage/plasmid                                                               | Characteristics                                                                                                         | Reference                                                                                             |
|------------------------------------------------------------------------------------|-------------------------------------------------------------------------------------------------------------------------|-------------------------------------------------------------------------------------------------------|
| <i>Yersinia pseudotuberculosis</i> (Y-716)                                         | O:1a                                                                                                                    | Strain collection of the Bundeswehr Institute of Microbiology                                         |
| <i>Yersinia similis</i> Y228 <sup>T</sup> (DSM18211)                               | O:6, isolated from rabbit                                                                                               | [7]                                                                                                   |
| <i>Yersinia wautersii</i> (Y-428) ( <i>Y. pseudotuberculosis</i> ('Korean group')) | O:4a, isolated from badger                                                                                              | [8]                                                                                                   |
| <i>Yersinia enterocolitica</i> (Y-929)                                             | O:3, isolated from hare                                                                                                 | Strain collection of the Bundeswehr Institute of Microbiology                                         |
| <i>Y. enterocolitica</i> subsp. <i>palearctica</i> (DSM 13030)                     | O:3, human isolate                                                                                                      | DSMZ-German Collection of Microorganisms and Cell Cultures                                            |
| Phage L-413C (NC_004745)                                                           | Caudovirales; Myoviridae; Peduovirinae; Peduovirus: Morphotyp A1 - Serovar 2                                            | [9]                                                                                                   |
| Phage ΦA1122 (NC_004777)                                                           | Caudovirales; Podoviridae; Autographivirinae; Teseptimavirus; Morphotyp C1 - Serovar 1                                  | [10]                                                                                                  |
| pEGFP-C1                                                                           | eGFP-Template                                                                                                           | Takara Bio Europe SAS (Saint-Germain-en-Laye, France)-                                                |
| mCherry-pBAD                                                                       | mCherry-Template                                                                                                        | [11]; Addgene plasmid #54630; <a href="http://n2t.net/addgene:54630">http://n2t.net/addgene:54630</a> |
| pASG-IBA 105*                                                                      | <i>tet</i> -Promoter, <i>Twin-Strep-tag</i> , <i>lacP/Z</i> , <i>f1</i> ori, Amp <sup>R</sup> , tetR, <i>colEI</i> ori, | IBA GmbH, Göttingen, Germany                                                                          |
| pASG 105::TST::eGFP:: L-413C-RPB                                                   | Derivative of pASG-IBA 105, encodes fusion protein of Twin-Strep-tag, eGFP, gpH (RBP)                                   | This work                                                                                             |
| pASG 105::TST::mCherry::L-413C-RPB                                                 | Derivative of pASG-IBA 105, encodes fusion protein of Twin-Strep-tag, mCherry, GpH (RBP)                                | This work                                                                                             |
| pASG 105::TST::eGFP:: ΦA1122-RPB                                                   | Derivative of pASG-IBA 105, encodes fusion protein of Twin-Strep-tag, eGFP, Gp17 (RBP)                                  | This work                                                                                             |
| pASG 105::TST::mCherry:: ΦA1122-RPB                                                | Derivative of pASG-IBA 105, encodes fusion protein of Twin-Strep-tag, mCherry, Gp17 (RBP)                               | This work                                                                                             |

**Supplementary Table S2: Oligonucleotide primer sequences used in this work.**

| Oligonucleotide | Sequence (5'-3')                                       |
|-----------------|--------------------------------------------------------|
| L-413Cp19-RBP F | AAA <u>CTC GAG</u> TCT ACC AAA TTC AAA ACC GTT ATC ACC |
| L-413C-p19RBP R | AAA <u>CGT ACG</u> AAC CTG AGC AAC GTT GTA CCA         |

---

|                 |                                                                                   |
|-----------------|-----------------------------------------------------------------------------------|
| A1122p42-RBP F  | AAA <u>CTC GAG</u> GCT AAC GTT ATC AAA ACC GTT CTG A                              |
| A1122p42-RBP R  | AAA <u>CGT ACG</u> AAC ATC TTC AAC AGC GAT AG                                     |
| eGFP forward    | AGCG <u>CGTCTCCAATGGTCGACGGTGAATTCGGCTGTACAGT</u> GAGCAAGGGCGAGGAGC<br>TGTCAC     |
| eGFP reverse    | AGCG <u>CGTCTCCTCCCCGTACGGCCCTGCAGACCCTCGAGCTTGTAGAGCTCGTCCATGCC</u><br>GAGAG     |
| mCherry forward | AGCG <u>CGTCTCCAATGGTCGACGGTGAATTCGGCTGTACAGT</u> TAGTAAAGGAGAAGAAA<br>ATAACATGGC |
| mCherry reverse | AGCG <u>CGTCTCCTCCCCGTACGGCCCTGCAGACCCTCGAGTTTGTATAGTTCATCCATGCC</u><br>ACCAG     |

---

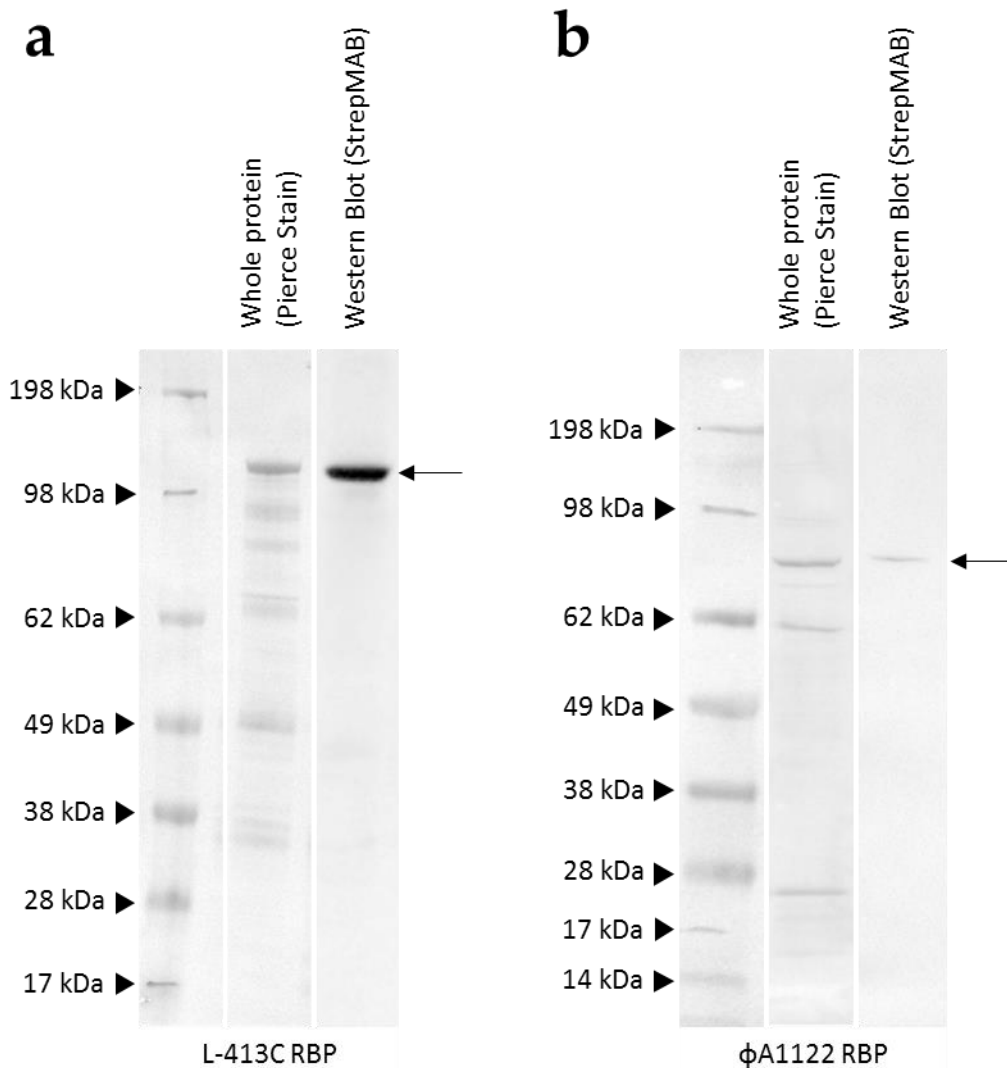

**Supplementary Figure S1:** Western blot of heterologously produced RBP fusion reporter proteins. Affinity purified proteins were subjected to SDS-PAGE, stained (Pierce stain) after transfer onto a nitrocellulose membrane and the TST epitope detected using a HRP-conjugated TST-antibody (StrepMAB, IBA GmbH, Göttingen, Germany). Expected sizes of RBP eGFP reporters: (a) L-413C RBP 130 kDa and (b) ΦA1122 RBP 93,5 kDa (indicated by arrows). Letters indicate size-positions of the protein size marker (SeeBlue Plus2 prestained, ThermoFisher Scientific, Darmstadt, Germany).

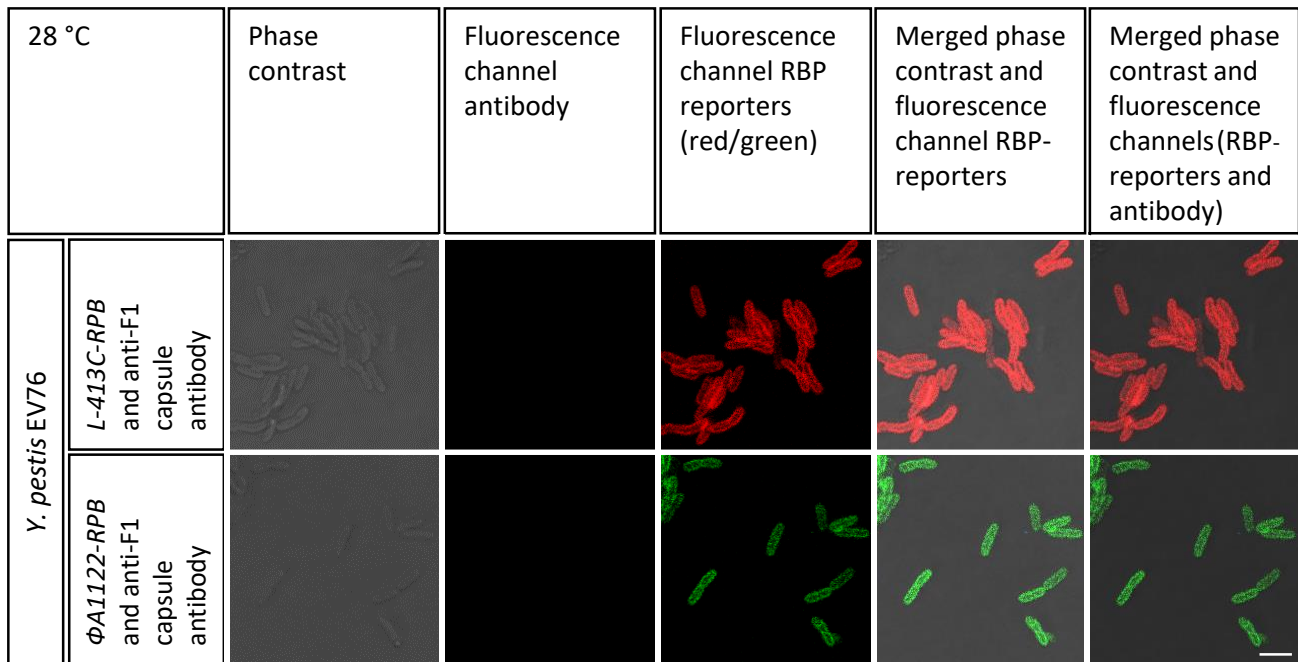

**Supplementary Figure S2:** Binding of RBP-reporters to growing cultures of *Y. pestis* EV76 cells at 28°C. In this representation, capsule formation was checked by incubation with a monoclonal anti-F1 capsule antigen antibody in combination with secondary antibody labelled with Alexa Fluor 488 for co-detection with L-413C-RBP-reporters or Alexa Fluor 647 for co-detection with ΦA1122-RPB-reporter, respectively. RBP binding to *Y. pestis* EV76 cells 6 h after inoculation at 28 °C is shown as individual representative micrographs for phage L-413C mCherry-RBP-reporter (red signals) or phage ΦA1122 eGFP-RBP-reporter (green signals) (as separate phase contrast, separate fluorescence or merged channels as indicated) (scale bar: 5 µm).

## References

1. Saltykova RA, Faibich MM [Experience from a 30-year study of the stability of the properties of the plague vaccine strain EV in the USSR]. *Zh Mikrobiol Epidemiol Immunobiol* **1975**; 3–8.
2. Paoli GC, Sommers CH, Scullen OJ, Wijey C Inactivation of avirulent *pgm(+)* and  $\Delta pgm$  *Yersinia pestis* by ultraviolet light (UV-C). *Food Microbiol* **2014**, *44*: 168–172.
3. Fetherston JD, Schuetze P, Perry RD Loss of the pigmentation phenotype in *Yersinia pestis* is due to the spontaneous deletion of 102 kb of chromosomal DNA which is flanked by a repetitive element. *Mol Microbiol* **1992**, *6*: 2693–2704.
4. Ginoza HS, Matney TS Transmission of a resistance transfer factor from *Escherichia coli* to 2 species of *Pasteurella*. *J Bacteriol* **1963**, *85*: 1177–1178.
5. Golubov A, Neubauer H, Nölting C, Heesemann J, Rakin A Structural organization of the pFra virulence-associated plasmid of rhamnose-positive *Yersinia pestis*. *Infect Immun* **2004**, *72*: 5613–5621.
6. Baltazard M, Bamanyar M, Mofidi C, Seydien B [Le foyer de peste du Kurdistan] The Kurdistan plague focus. *Bull World Health Organization* **1952**, *5*: 441–472.
7. Sprague LD, Scholz HC, Amann S, Busse HJ, Neubauer H *Yersinia similis* sp. nov. *Int J Syst Evol Microbiol* **2008**, *58*: 952–958.
8. Savin C, Martin L, Bouchier C, Filali S, Chenau J, Zhou Z, Becher F, Fukushima H, Thomson NR, Scholz HC, Carniel E The *Yersinia pseudotuberculosis* complex: characterization and delineation of a new species, *Yersinia wautersii*. *Int J Med Microbiol* **2014**, *304*: 452–463.

9. Garcia E, Chain P, Elliott JM, Bobrov AG, Motin VL, Kirillina O, Lao V, Calendar R, Filippov AA Molecular characterization of L-413C, a P2-related plague diagnostic bacteriophage. *Virology* **2008**, 372: 85–96.
10. Garcia E, Elliott JM, Ramanculov E, Chain PS, Chu MC, Molineux IJ The genome sequence of *Yersinia pestis* bacteriophage phiA1122 reveals an intimate history with the coliphage T3 and T7 genomes. *J Bacteriol* **2003**, 185: 5248–5262.
11. Shaner NC, Campbell RE, Steinbach PA, Giepmans BN, Palmer AE, Tsien RY Improved monomeric red, orange and yellow fluorescent proteins derived from *Discosoma* sp. red fluorescent protein. *Nat Biotechnol* **2004**, 22: 1567–1572.
